# Supplementary material for: Inhibition of miR-200b Promotes Angiogenesis in Endothelial Cells by Activating The Notch Pathway
Source: PubMed Central journal article supplement (PMC7944128; doi:10.22074/cellj.2021.7080), 2021-03-01
Supplement: Cell-J-23-51-s01.pdf [file Cell-J-23-51-s01.pdf]

## Supplementary Information for

# Inhibition of miR-200b promotes angiogenesis in endothelial cells by activating the Notch pathway

Tie-Ying Qiu, M.M.<sup>1</sup>, Jin Huang, M.D.<sup>1</sup>, Li-Ping Wang, M.M.<sup>1</sup>, Bi-Song Zhu, M.D.<sup>2\*</sup>

1. Clinical Nursing Teaching and Research Section of the Second Xiangya Hospital, Changsha 410011, P.R. China  
2. Organ Transplant Center, Xiangya Hospital, Central South University, Changsha 410008, P.R. China

\*Corresponding Address: Organ Transplant Center, Xiangya Hospital, Central South University, Changsha 410008, P.R. China  
Email: 277364307@qq.com

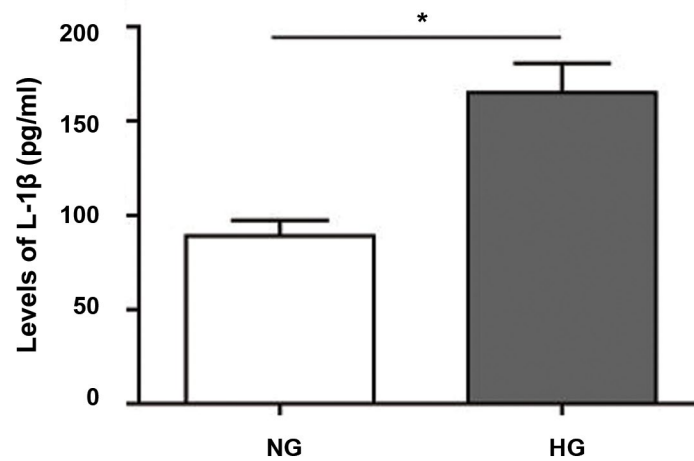

**Fig.S1:** Quantification of secreted Interleukin-1 beta (IL-1β) from HUVECs, as determined by enzyme-linked immunosorbent assay (ELISA) after the indicated treatment.
